# Supplementary material for: Combined PacBio Iso-Seq and Illumina RNA-Seq Analysis of the Tuta absoluta (Meyrick) Transcriptome and Cytochrome P450 Genes
Source: MDPI journal article supplement (doi:10.3390/insects14040363), 2023-04-06
Supplement: s1 [file s1]

Supplementary information

Additional images

S1

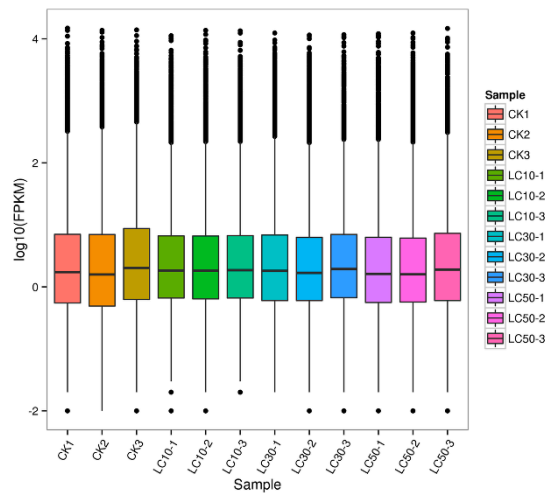

Figure S1 FPKM boxplot of each sample

(The ordinate represents the logarithm of the FPKM expression level. This figure shows the expression level of each sample from the perspective of overall dispersion of the expression level)

S2

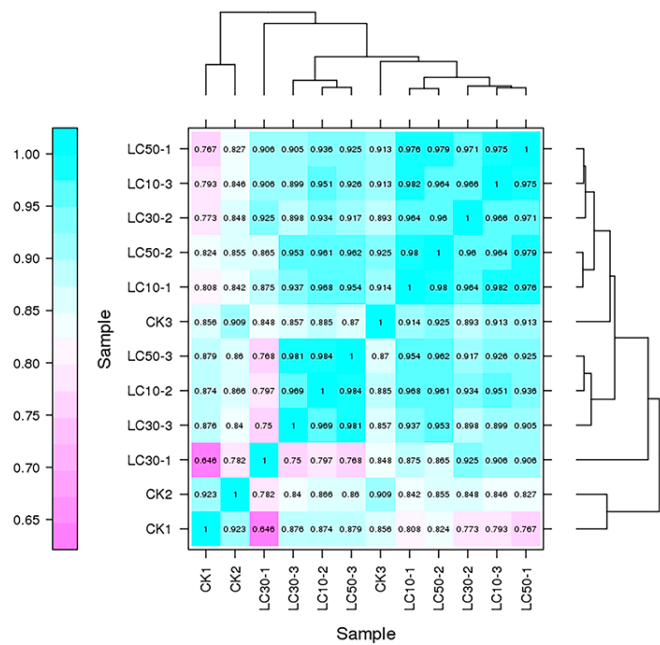

Figure S2 Heat map of expression correlation between pairwise samples

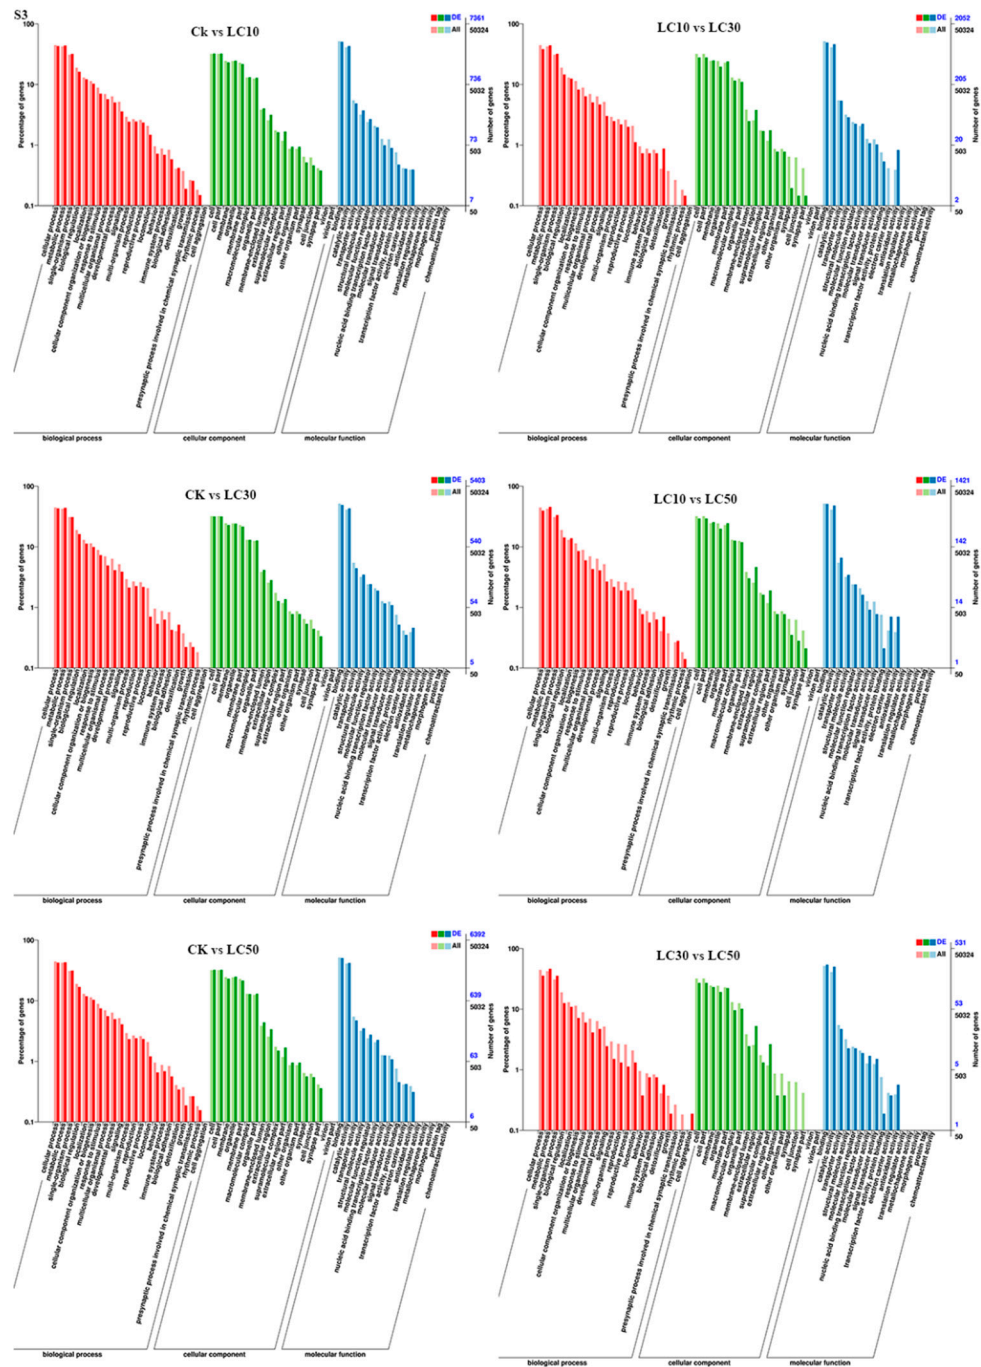

Figure S3 GO annotation classification chart of DEG se

Additional table

**Table S1 Primer sequences of quantitative real-time PCR**

| Gene ID            | Gene name         | Direction | Primers sequences       |
|--------------------|-------------------|-----------|-------------------------|
| BMK_Unigene_050670 | <i>CYP4M116</i>   | F         | GACGCCAACTTTCCACTTCAAC  |
|                    |                   | R         | GCCCATCGCTGTTTCGCATA    |
| BMK_Unigene_051429 | <i>CYP6AW1</i>    | F         | GCCTTGAAACATCAGCCACAAC  |
|                    |                   | R         | GTCAATCCGTCGTGCTTACTCA  |
| BMK_Unigene_048006 | <i>CYP339A1</i>   | F         | TCTCGCTTCACCTCGTCCTG    |
|                    |                   | R         | CGAACGGCAGAACCATAGACTC  |
| BMK_Unigene_001201 | <i>CYP9A307v2</i> | F         | AAAGGTTTCGTGGGCAGATTCTG |
|                    |                   | R         | TCGTTCAGGAAGTCTCGGTGAT  |
| BMK_Unigene_073841 | <i>CYP4S55</i>    | F         | GGTTCCACGAGAGCATCTATTCA |
|                    |                   | R         | CGAGAGCACCCACCTCAACATC  |
| BMK_Unigene_052058 | <i>CYP15C1</i>    | F         | GCAGCAGGAGATAGATGAAGTCA |
|                    |                   | R         | CACGGAGGATATGCGAAGAGTT  |
| BMK_Unigene_073442 | <i>CYP321C40</i>  | F         | GGAATGAGATACGCACGACTACA |
|                    |                   | R         | CACCGCTTGCTTGCTGTACT    |
| BMK_Unigene_096077 | <i>CYP6AB327</i>  | F         | AAGGTGCTCTAGTGGGAGAATCT |
|                    |                   | R         | AATCCTGCGGCGAAGAATACAA  |
|                    | <i>EF1α</i>       | F         | CCCATACAGTGAATCCCGTTTCG |
|                    |                   | R         | TTGTCTCCGTGCCATCCAGAA   |
